# Supplementary material for: RT-RPA Assay Combined with a Lateral Flow Strip to Detect Soybean Mosaic Virus
Source: PubMed Central journal article supplement — Plant Pathol J. 2024 Aug 1;40(4):337–45. doi: 10.5423/PPJ.OA.02.2024.0027 (PMC11309845; doi:10.5423/ppj.oa.02.2024.0027), 2024-08-01
Supplement: PPJ-OA-02-2024-0027-Supplementary-Table-1.pdf [file PPJ-OA-02-2024-0027-Supplementary-Table-1.pdf]

**Supplementary Table 1.** Primer lists of the reverse transcription-polymerase chain reactions

| Target          | Primer              | Sequence                 | Target size (bp) | Reference          |
|-----------------|---------------------|--------------------------|------------------|--------------------|
| SMV             | SMV C20             | TGCCTATACCCCTCAACAT      | 492              | Lee et al. (2012)  |
|                 | SMV N40             | CATATCAGTTTGTGGGCA       |                  |                    |
| SYMMV           | SYMMV F01           | TATCCACCATTTAATCTTTCAGG  | 551              |                    |
|                 | SYMMV R05           | TAACGGGTCATTCATCAACTTCAT |                  |                    |
| TSWV            | TSWV NCP For        | ATGTCTAAGGTTAAGCTCAC     | 777              | Yoon et al. (2014) |
|                 | TSWV NCP Rev        | TCAAGCAAGTTCTGCGAGTT     |                  |                    |
| CMV             | CMV For             | CTCCCACGGCGATAAAGGACTACT | 236              | Lee (2022)         |
|                 | CMV Rev             | TTTCACACAAGCGGAGGGCAC    |                  |                    |
| CIYVV           | CIYVV For           | GGACTGCTGAACTTGGACCA     | 200              | -                  |
|                 | CIYVV Rev           | TGAAGATCACCTGACGTGCC     |                  |                    |
| <i>ACT</i> gene | <i>ACT</i> gene For | TCGTATGAGCAAGGAAATTGG    | 101              | Libault (2008)     |
|                 | <i>ACT</i> gene Rev | TAGAGCCACCAATCCAGACAC    |                  |                    |

SMV, soybean mosaic virus; SYMMV, soybean yellow mottle mosaic virus; TSWV, tomato spotted wilt virus; CMV, cucumber mosaic virus; CIYVV, clover yellow vein virus.

## References

- Lee, H. T. 2022. Development of lateral flow reverse transcription recombinase polymerase amplification (LF RT-RPA) for detection of cucumber mosaic virus (CMV) on *Cnidium officinale* in field. M.S. thesis. Jeonbuk National University, Jeonju, Korea.
- Lee, Y. H., Lim, S. T., Yoon, Y. N., Jeon, M. G., Yun, H. T., Ko, J. M., Lee, S. H., Lee, K. W. and Baek, I. Y. 2012. Incidence of soybean viral diseases in Korea. *Korea Soybean Digest* 29:7-15.
- Libault, M. A. R. C., Thibivilliers, S., Bilgin, D. D., Radwan, O., Benitez, M., Clough, S. J. and Stacey, G. 2008. Identification of four soybean reference genes for gene expression normalization. *Plant Genome* 1:44-54.
- Yoon, J.-Y., Choi, G.-S., Cho, I.-S. and Choi, S.-K. 2014. Development of a novel sap extraction buffer for simultaneous detection of pepper viruses using VC/RT-PCR. *J. Korean Soc. Int. Agric.* 26:41-47 (in Korean).
